# Supplementary material
Source: MDPI journal article supplement (https://www.mdpi.com/1999-4907/11/8/867)
Supplement: s1 [file s1]

1 **Supplementary materials**

2

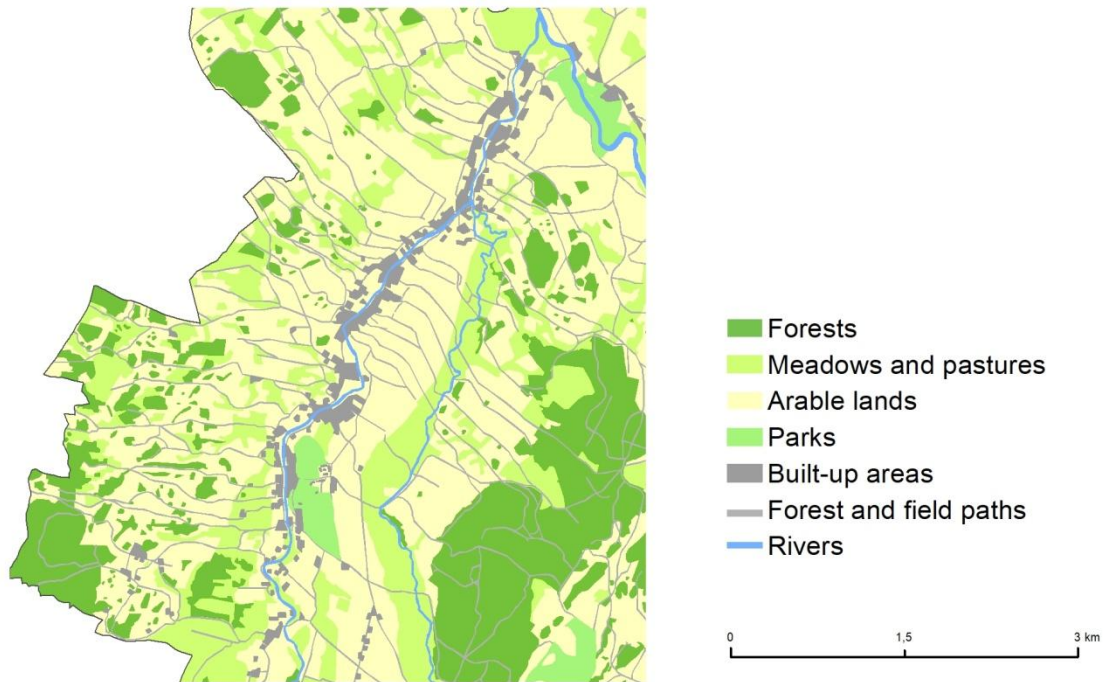

3 Figure S1. Historic land use – system, Mysłakowice (Erdmannsdorf), 1886.

4

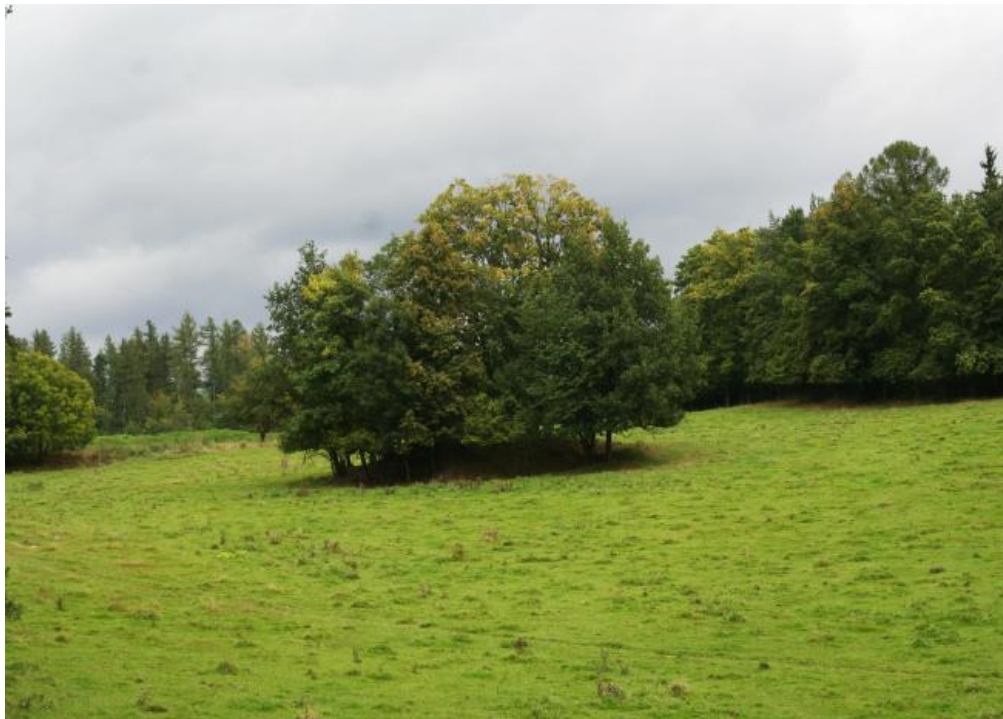

Figure S2. Surviving historical tree planting in a pasture, Bukowiec (Buchwald), 2012.

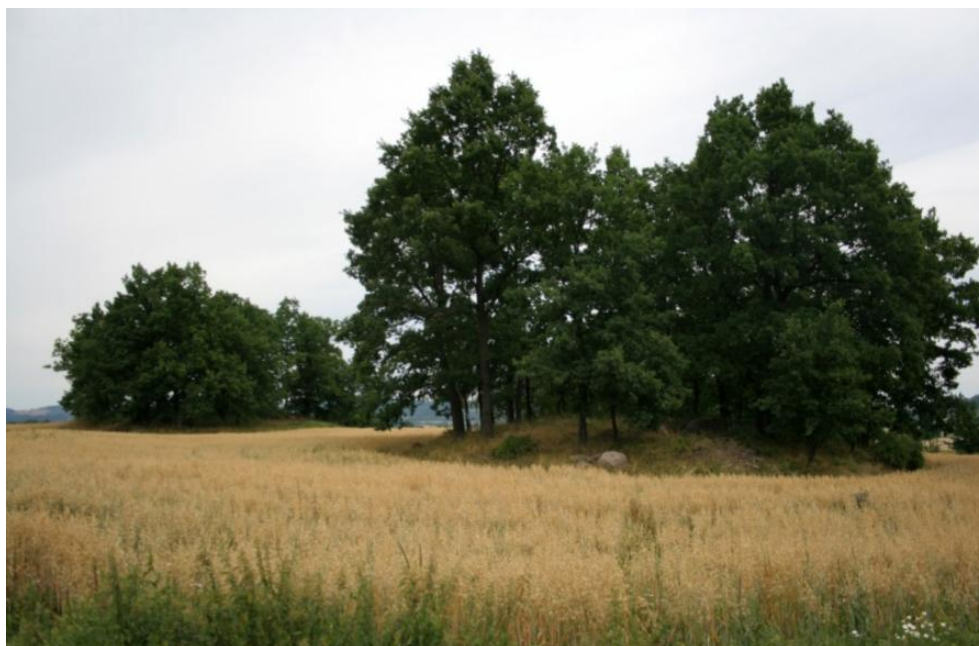

Figure S3. Forests and pasture tree plantings, Wojanów (Schildau), 2012.

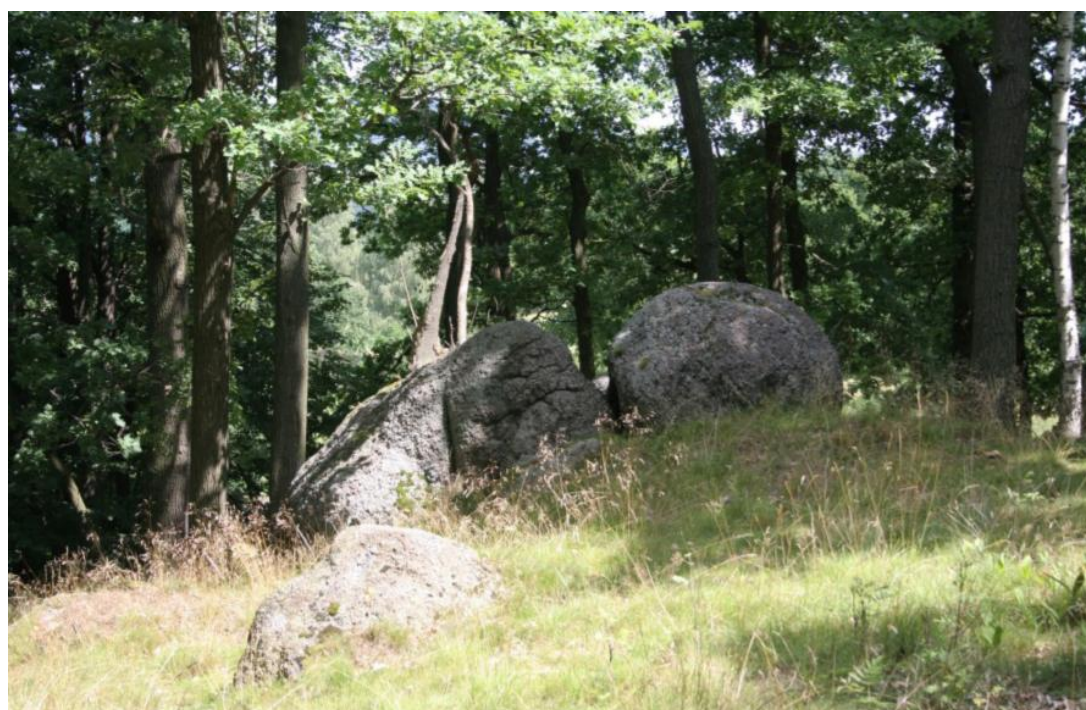

5 Figure S4. Forest on the hill peak Trzcińsko (Rohrlach), 2012.  
6



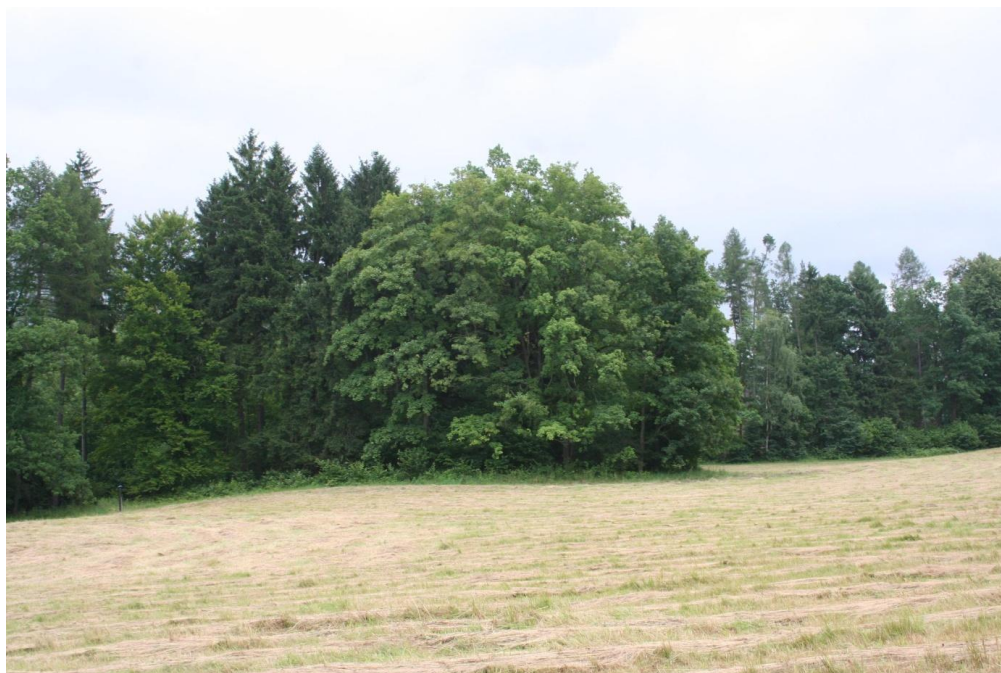

7 Figure S5. Former pasture tree plantings incorporated into ornamental farm, Bukowiec (Buchwald), 2012.

8

9

10

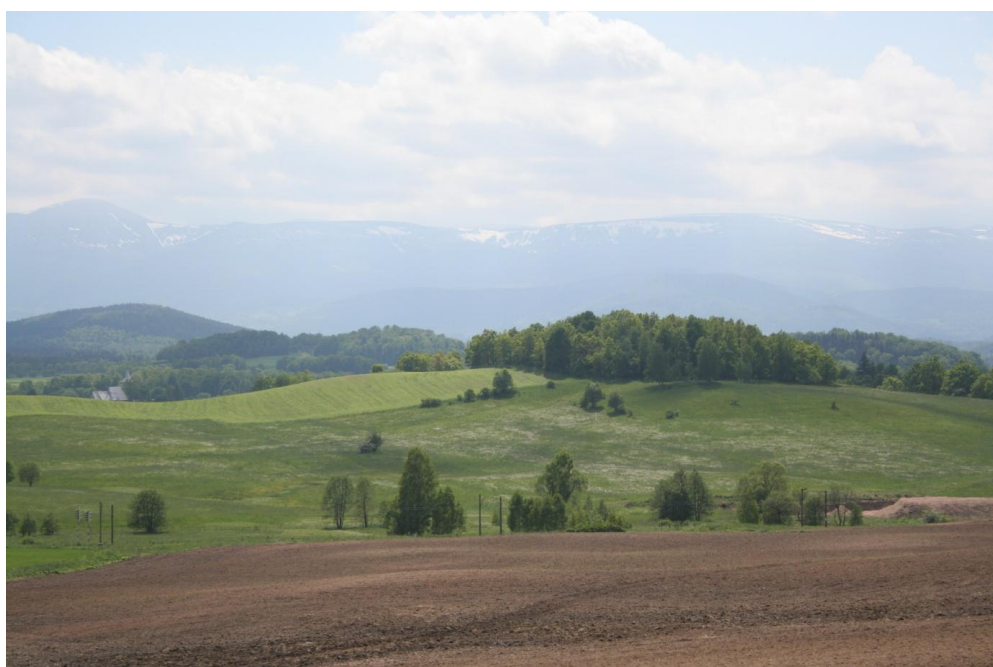

11 Figure S6. Ornamental forests and pasture tree plantings, Łomnica (Lomnitz), 2012.

12

13

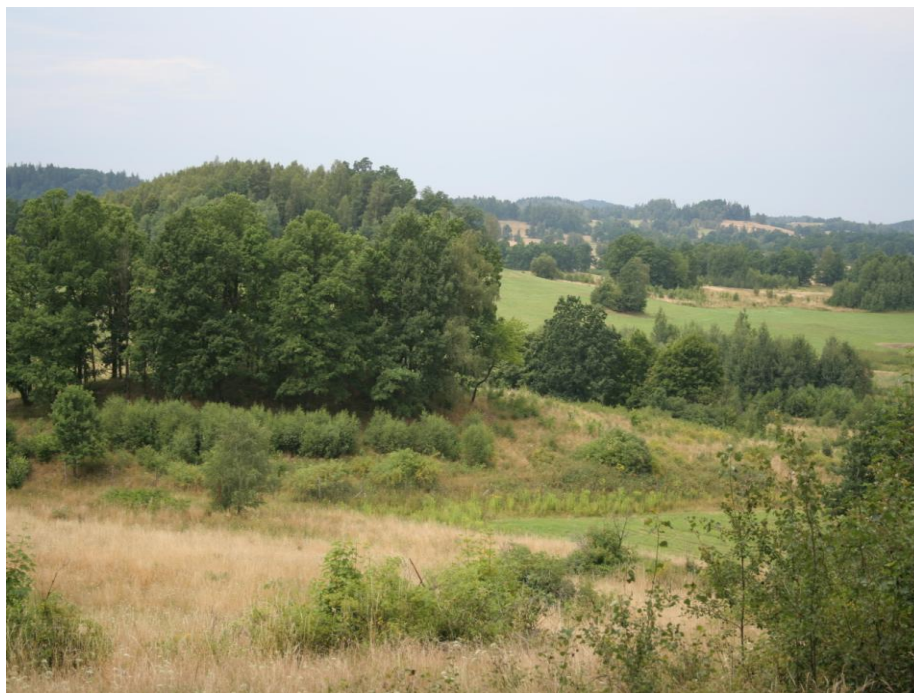

14 Figure S7. Former pasture tree plantings and an area of natural succession on former agricultural land,  
15 Wojanów (Schildau), 2012.

16
